# Supplementary material for: Di-(2-ethylhexyl) Phthalate Triggers Proliferation, Migration, Stemness, and Epithelial–Mesenchymal Transition in Human Endometrial and Endometriotic Epithelial Cells via the Transforming Growth Factor-β/Smad Signaling Pathway
Source: MDPI journal article supplement (doi:10.3390/ijms23073938), 2022-04-01
Supplement: s1 [file s1]

## Supplementary Materials

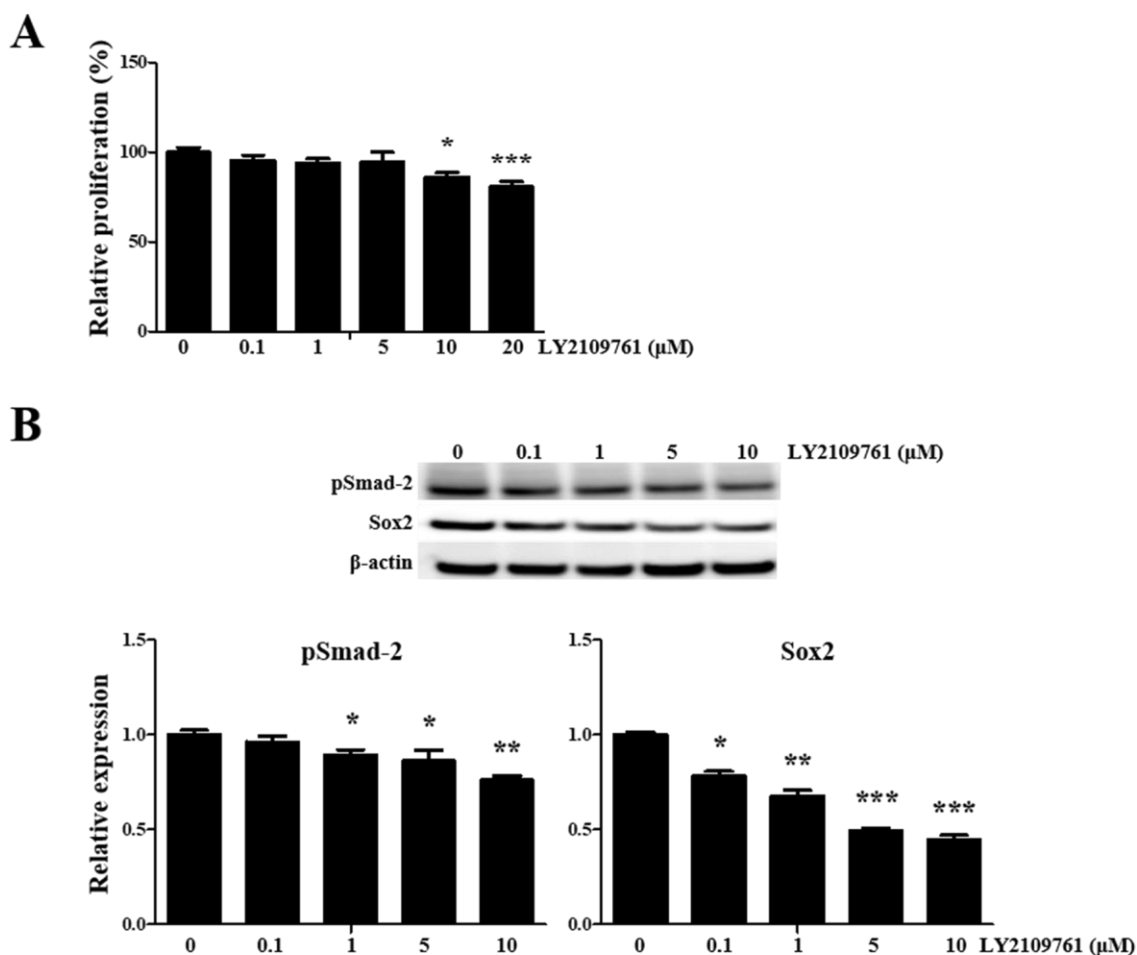

**Figure S1.** The selective TGF- $\beta$ R1/2 inhibitor LY2109761 inhibits cell proliferation by pSmad-2 suppression in human endometrial epithelial cells. (A) LY2109761 (0.1 to 20  $\mu$ M) displays cellular toxicity dose-dependently. (B) LY2109761 (0.1 to 10  $\mu$ M) represses pSmad-2 and Sox2 protein levels, as detected using western blot analysis.  $\beta$ -actin was used as the internal loading control for data normalization. All data are expressed as relative values against their respective control group. Data represent the mean  $\pm$  standard deviation of three independent experiments. \*  $p < 0.05$ , \*\*  $p < 0.01$ , and \*\*\*  $p < 0.001$ .
